---

Special Issue

# Identification and Quantification of Antipsychotics in Blood Samples by LC–MS–MS: Case Reports and Data from Three Years of Routine Analysis

Paula Proença<sup>1,\*</sup>, Carla Monteiro<sup>1</sup>, Carla Mostra<sup>1</sup>, Alda Claro<sup>1</sup>, João Franco<sup>2</sup> and Francisco Corte-Real<sup>1,3</sup>

<sup>1</sup>Instituto Nacional de Medicina Legal e Ciências Forenses, I.P., Delegação do Centro, Coimbra, Portugal, <sup>2</sup>Instituto Nacional de Medicina Legal e Ciências Forenses, I.P., Delegação do Sul, Lisboa, Portugal and <sup>3</sup>Faculdade de Medicina, Universidade de Coimbra, Coimbra, Portugal

\*Author to whom correspondence should be addressed. Email: [paula.i.proenca@inmlcf.mj.pt](mailto:paula.i.proenca@inmlcf.mj.pt)

## Abstract

Antipsychotic drugs (AP) are widely prescribed for the treatment of schizophrenia and psychosis. The pharmacological treatment of schizophrenia is often performed with the simultaneous use of two or more antipsychotic agents to achieve the desired control of psychotic symptoms. Available AP include both conventional (typical) and new (atypical) antipsychotic medications. Atypical AP, such as quetiapine, now account for the vast majority of AP prescriptions. In forensic toxicology, AP are of considerable interest because of their potential abuse and their involvement in intoxications and suicides. The authors retrospectively examined AP positive cases detected in samples collected during autopsies performed in the Forensic Clinical and Pathology Service of National Institute of Legal Medicine and Forensic Sciences Centre Branch or in other autopsies carried out in the central region of Portugal, between January 2016 and December 2018. A quantitative liquid chromatography–tandem mass spectrometry assay was developed for the simultaneous determination of 16 AP (amisulpride, aripiprazole, chlorpromazine, clozapine, cyamemazine, fluphenazine, haloperidol, levomepromazine, melperone, olanzapine, paliperidone, promethazine, quetiapine, risperidone, sulpiride and ziprasidone) in blood samples of postmortem cases. The Laboratory of Forensic Chemistry and Toxicology received 3,588 requests for toxicological analysis: 1,413 cases were positive for drugs from which 351 (24.8%) cases were positive for AP, 60.1% from male individuals and 39.9% from female. Quetiapine was the most prevalent AP (36.5%) followed by olanzapine (20.8%). During this period, there were 25 postmortem cases with AP blood concentrations above therapeutic range, in which 36% of those are in agreement with the information received (psychological history or acute intoxication suspicion) and the manner of death was suicide. Our results point that antipsychotics are an increasingly prevalent class of drugs. AP must be measured not only in toxic concentrations but also in therapeutic levels in postmortem cases; therefore, it is important to come up with a sensitive method to cover the low therapeutic range in which AP are usually present.

## Introduction

Antipsychotic drugs (AP) are used to control a wide range of severe psychiatric disorders including schizophrenia and other psychoses, bipolar disorder, severe anxiety and depression, behavioral disorders and dementia (1).

The AP drugs are a heterogeneous group of compounds that can be divided into subgroups based on their chemical structure. The typical AP, also known as first-generation drugs, are represented mainly by phenothiazine derivatives, butyrophenones and thioxanthenes. Those drugs have a high affinity for D<sub>2</sub> receptors (e.g., fluphenazine and haloperidol), and due to that pharmacological action, they carry relatively high risks of extrapyramidal symptoms, even at moderate doses (2–4).

The discovery of clozapine's unique clinical features and binding profile has led to the development of second-generation AP that potentially antagonize the 5HT<sub>2A</sub> receptor while possessing less affinity for D<sub>2</sub> receptors than typical AP agents (5). Although atypical AP cause significantly milder extrapyramidal symptoms than typical AP, the former is associated with a higher incidence of other adverse effects, such as metabolic dysfunction, weight gain, sedation and an increase risk of mortality due to sudden death usually attributed to QT prolongation and increased risk of torsade de pointes and potentially lethal arrhythmias (1, 6, 7).

The pharmacokinetics of atypical AP are similar to that of conventional agents. AP are rapidly and completely absorbed after oral administration. Most antipsychotics are highly lipophilic and accumulate in the brain and in other organs with a rich blood supply. They are also highly protein bound and often undergo extensive first-pass hepatic metabolism. Time to peak plasma concentration ranges from 1 to 10 hours and have large volumes of distribution. Long elimination half-lives of AP allow for once to twice-daily dosing (2, 8, 9).

In Portugal, between 2008 and 2017, there has been a rise in the consumption of AP, which keeps up with the trend reported previously by INFARMED, I.P. (10), and the atypical antipsychotics are the most consumed group (11). In a forensic setting, the detection of AP is of considerable interest because of their potential abuse and their involvement in intoxications and suicides, since it is not infrequent to detect AP in postmortem samples (12). However, the diagnosis of fatal intoxication is a challenging task, mainly because the reference information about some substances is scarce or not available, and because the potential synergic effects of the different substances found in biological matrices still need to be clarified (13).

Liquid chromatography–tandem mass spectrometry (LC–MS–MS) has proven to be a powerful tool for determining drug concentrations in biological matrices, and several LC–MS–MS methods for the determination of AP have previously been published (13–19). Some authors (20–23) presented an overview of bioanalytical methods for the determination of AP.

In this study, we evaluate the detection of AP in postmortem blood samples in order to provide more details related to the toxicological analysis because these drugs play an important role in the cause of death.

## Materials and Methods

### Study population

This is a retrospective observational study based on case reports and data of 3 years of toxicological analysis from the Portuguese population-based registers. We have focused our study in the AP

positive cases detected in blood samples collected during autopsies performed in the Forensic Clinical and Pathology Service of National Institute of Legal Medicine and Forensic Sciences Centre Branch or in other autopsies carried out in the central region of Portugal.

Between January 2016 and December 2018, the Laboratory of Forensic Chemistry and Toxicology received 3,588 requests for toxicological analysis: 1,413 cases were positive for drugs (including antipsychotics, cardiac drugs, anticonvulsants, antidepressants and antihypertensives) from which 351 cases were positive for AP.

The assessment of the examination protocols was conducted by means of a tabular database according to the following criteria: year, age, sex, manner of death and/or cause of intoxication information, and AP drugs detected.

### Chemicals and materials

Aripiprazole, chlorpromazine, clozapine, fluphenazine, haloperidol, olanzapine, promethazine, quetiapine and risperidone were obtained from Cerilliant (Round Rock, TX, USA). Levomepromazine, melperone, paliperidone 9-hydroxyrisperidone, sulphiride and ziprasidone were provided by Lipomed (Arllesheim, Switzerland). Amisulpride was purchased from LGC Standards (Luckenwalde, Germany) and cyamemazine was from Sigma-Aldrich (Saint Louis, MO, USA). The deuterated internal standards (IS) clomipramina-d<sub>3</sub>, olanzapine-d<sub>8</sub> and zolpidem-d<sub>6</sub> were purchased from Cerilliant. Formic acid extra pure (98–100%) was from Merck (Darmstadt, Germany). Acetonitrile, methanol and water LC–MS grade were purchased from Honeywell Riedel-de-Haën (Seelze, Germany). Oasis HLB<sup>®</sup> SPE cartridges (60 mg, 3 mL), used for sample preparation, were from Waters<sup>®</sup> Corporation (Milford, MA, USA) and were used on a solid-phase system Vac Elut EPS 24 from Varian (Harbor City, CA, USA).

The working standard solutions were prepared by dilution of stock solutions to appropriate concentrations. All solutions were stored at –20°C.

### Blood samples

The antemortem blood samples, with whole blood stored in saline-adenine-glucose-mannitol, were obtained from the Portuguese Blood Institute (Coimbra, Portugal). The postmortem blood samples were obtained from autopsies performed at the National Institute of Legal Medicine and Forensic Sciences and were collected into plastic tubes containing 1% potassium fluoride. All the samples were stored at –20°C prior to analysis and were previously screened to verify that they were drug-free.

### LC conditions

A Waters Acquity Ultra Performance LC system (Waters<sup>®</sup> Corporation) composed of a binary solvent delivery manager, a thermostatted autosampler and column oven compartment was used. Separation was performed with an Acquity UPLC<sup>®</sup> HSS3 column, 2.1 × 100 mm, packed with 1.8 μm particles, which was maintained at 35°C.

The mobile phase, consisting of acetonitrile (solvent A) and 0.1% formic acid in water (solvent B), was delivered at a flow rate of 0.50 mL/min. The gradient program was as follows: initial 75% B, during 1 min, then gradient elution was performed by changing the mobile phase from 75% to 40% B between 1 and 6 min, and after this time, reversion of the mobile phase to 75% B. At the end of this sequence, the column was equilibrated under initial conditions for 1 min. The autosampler temperature was set at 15°C, and the

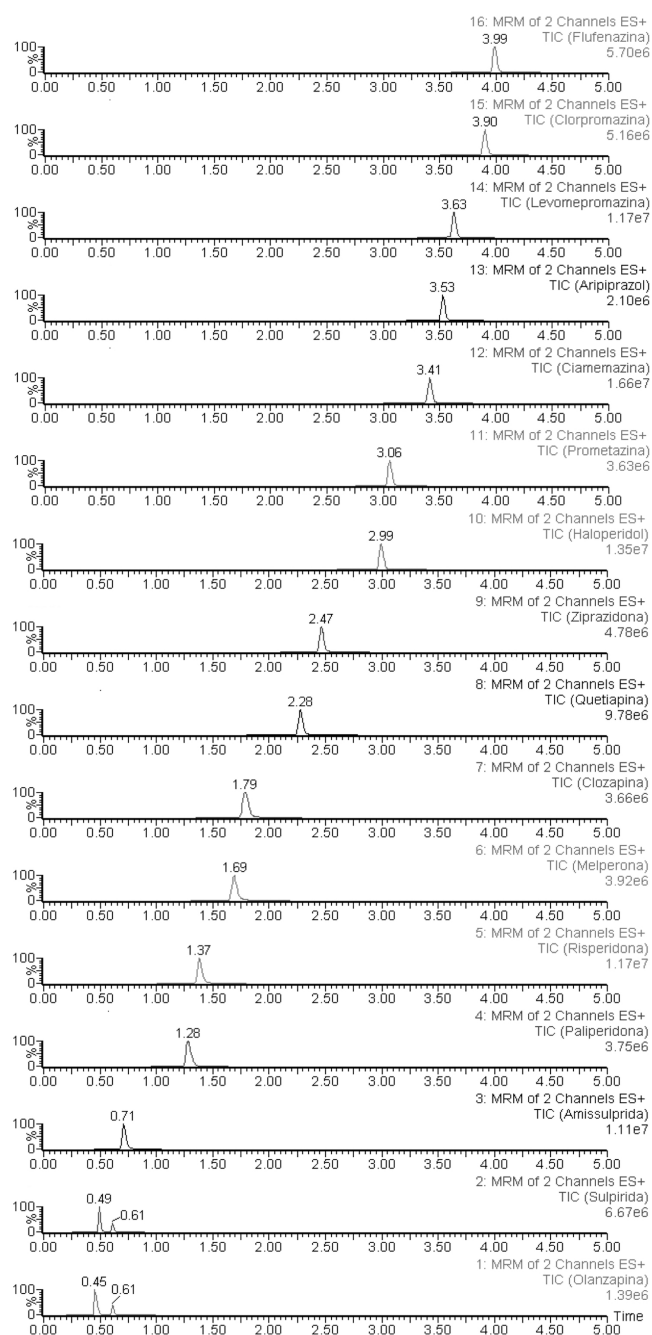

**Figure 1.** MRM chromatograms of a blood sample with the 16 AP drugs fortified at 50 µg/L.

injection volume was 10 µL using partial loop injection with needle overflow flush. The system was equipped with strong and weak wash solution reservoirs. Figure 1 shows the chromatograms of the 16 AP.

### MS-MS conditions

Detection was carried out using an Acquity™ TQD tandem-quadrupole MS equipped with a Z-spray electrospray ionization source (Waters® Corporation).

Electrospray ionization-MS-MS detection was performed in the multiple reaction monitoring (MRM) mode using positive ionization. Parameters were as follows: capillary voltage was set to 3.0 kV,

extractor voltage to 3.0 V and the source temperature to 150°C. Nitrogen obtained from a nitrogen generator (99.93%, Domnick hunter, N2MID 600, England) was used for desolvation, delivered at a temperature of 450°C and a gas flow rate of 900 L/h. The cone gas was set to 0 L/h; desolvation and collision gas (argon) flow was set to 0.21 mL/min in the collision cell.

The MRM transitions, cone voltages and collision energies for the different analytes were optimized by direct infusion into the MS. For each analyte, the most intense ion transition was used for quantitation and the second one to confirm its identification. Retention time, cone voltage, collision energy and MRM transitions for

**Table I.** Retention Time (RT), Cone Voltage (CV), Optimized Ion Transitions, Collision Energy (CE) for Analytes and Internal Standards (IS)

| Analyte                          | RT (min) | CV (V) | Target ion transition ( <i>m/z</i> ) | CE (eV) | Qualifier ion transition ( <i>m/z</i> ) | CE (eV) |
|----------------------------------|----------|--------|--------------------------------------|---------|-----------------------------------------|---------|
| Amisulpride                      | 0.71     | 60     | 370.1 > 242                          | 30      | 370.1 > 195.9                           | 41      |
| Aripiprazole                     | 3.53     | 40     | 448 > 285.2                          | 20      | 448 > 176.1                             | 20      |
| Chlorpromazine                   | 3.90     | 20     | 319.2 > 86.2                         | 15      | 319.2 > 58.2                            | 30      |
| Clomipramine-d <sub>3</sub> (IS) | 3.86     | 30     | 318.1 > 88.8                         | 20      | –                                       | –       |
| Clozapine                        | 1.79     | 40     | 327.3 > 270.3                        | 25      | 327.3 > 192.1                           | 35      |
| Cyamemazine                      | 3.41     | 30     | 341.1 > 100.2                        | 18      | 341.1 > 58.1                            | 30      |
| Fluphenazine                     | 3.99     | 55     | 438 > 70                             | 40      | 438 > 143.1                             | 40      |
| Haloperidol                      | 2.99     | 40     | 376.3 > 165.2                        | 26      | 376.3 > 122.9                           | 30      |
| Levomepromazine                  | 3.63     | 41     | 329.1 > 100.2                        | 25      | 329.1 > 58.1                            | 59      |
| Melperone                        | 1.69     | 50     | 264 > 165.2                          | 20      | 264 > 123.1                             | 20      |
| Olanzapine                       | 0.45     | 20     | 313.1 > 256.3                        | 25      | 313.1 > 84.4                            | 20      |
| Olanzapine-d <sub>8</sub> (IS)   | 0.45     | 50     | 321.1 > 261                          | 20      | –                                       | –       |
| Paliperidone                     | 1.28     | 55     | 427.2 > 270.2                        | 16      | 427.2 > 110                             | 30      |
| Promethazine                     | 3.06     | 36     | 285.2 > 86.2                         | 27      | 285.2 > 198.1                           | 35      |
| Quetiapine                       | 2.28     | 46     | 384.3 > 253.2                        | 20      | 384.3 > 221.2                           | 30      |
| Risperidone                      | 1.37     | 46     | 411.2 > 191.2                        | 26      | 411.2 > 110.2                           | 52      |
| Sulpiride                        | 0.49     | 50     | 242.2 > 112.2                        | 37      | 242.2 > 214.1                           | 45      |
| Ziprasidone                      | 2.43     | 40     | 413 > 194                            | 22      | 413 > 159.2                             | 30      |
| Zolpidem-d <sub>6</sub> (IS)     | 1.38     | 56     | 314.5 > 235.3                        | 38      | –                                       | –       |

amisulpride, aripiprazole, chlorpromazine, clozapine, cyamemazine, fluphenazine, haloperidol, levomepromazine, melperone, olanzapine, paliperidone, promethazine, quetiapine, risperidone, sulpiride, ziprasidone and IS are listed in Table I.

System operation and data acquisition were controlled using Masslynx™ v4.2 SNC 989 software (Waters® Corporation) with automated data processing using the TargetLynx™ Application Manager (Waters® Corporation). IntelliStart™ software (Waters® Corporation) was used to control the fluidics device to infuse solutions for tuning the MS.

### Sample preparation

The quality control (QC) and the calibration samples were prepared by spiking drug-free blood samples with methanolic working standard solutions.

Qualitative analysis was performed in central blood sample (clomipramine-d<sub>3</sub> as IS), and peripheral blood was selected for the corresponding quantitative analysis (zolpidem-d<sub>6</sub> used as IS and olanzapine-d<sub>8</sub>).

A 0.5 mL aliquot of blood sample was spiked with 50 µL of IS at a concentration of 100 µg/L, and 2 mL of water was added. The mixture was vortexed for 30 s following centrifugation at 1670 × *g* for 5 min and loaded into HLB cartridge, which has been conditioned with 2 mL methanol followed by 2 mL water. The washing of the cartridges was carried out with 5% (v/v) aqueous methanol (2 mL). Vacuum was applied on the solid-phase system for 10 min until dryness of solvent. The analytes were eluted with 2 mL methanol. The eluate was evaporated at 40°C until dryness under a gentle stream of nitrogen using a Caliper Turbo Vap LV evaporator (Caliper, Hopkinton, MA, USA). The dried extract was then reconstituted with 150 µL of mobile phase [25:75, (v/v) acetonitrile/0.1% formic acid in water], and 10 µL was injected into the LC–MS–MS system.

### Method validation

The described procedure was validated according to internationally accepted recommendations (24–26).

The selectivity and capacity of identification were ensured by a combination of relative retention time and ion ratio criteria (27) that guaranteed the substance identification for the positive samples and by the analysis of the negative samples that showed no peaks that could interfere with the detection of the compounds of interest. Ten pools of drug-free blood samples, nine consisting of a mixture of four postmortem blood samples and one prepared with three antemortem blood samples, were extracted as described previously without the addition of IS. In addition, a blank sample with IS was analyzed for peaks deriving from IS and interfering with the detection of the analytes. The assay was found to be selective and specific for all tested compounds; no interfering peaks were observed.

There were no distinct differences in ion-suppression or enhancement effects for antemortem and postmortem blood samples. Therefore, it was possible to conclude that the method did not present significant matrix effects.

Calibration curves were linear in a concentration range of 5–500 µg/L and a linear regression (1/*x*<sup>2</sup> weighting) was used for all drugs. The calibration fit showed a coefficient of determination of *r*<sup>2</sup> > 0.99 for all AP.

The limit of quantification was defined as the lowest point of calibration curve.

QC samples were prepared at the concentration of 50 and 200 µg/L. Three samples of each QC concentration were measured over a period of 5 consecutive days. Precision data for within-day (repeatability) and time-different intermediate precision (combination of within and between-day effect) were calculated using one-way analysis of variance with the grouping-variable day. Repeatability was estimated in a single assay by extraction and analysis of QC samples with five replicates at each concentration. Repeatability and intermediate precision values expressed as relative standard deviation (RSD) % were lower than 15%, which is within the acceptance criteria for validating analytical methods.

Accuracy data were within the acceptance interval of ±15% of the nominal values for all drugs.

As previously described (14, 28–30), olanzapine showed instability in several validation experiments due to its degradation

rate. To prevent degradation of olanzapine, all samples including extracted standards were protected from light and olanzapine was analyzed by LC-MS-MS quickly after extraction.

### Statistical analyses

Statistical analyses were conducted using the IBM Statistical Package for Social Sciences, version 25 for Windows (IBM, Armonk, NY, USA). Levene test was performed to compare continuous and normally distributed variable and categorical variable. Statistical significance was accepted at the  $P < 0.05$ .

## Results and Discussion

A total of 1,413 positive drug cases (including antipsychotics, cardiac drugs, anticonvulsants, antidepressants and antihypertensives) from central Portugal were obtained between January 2016 and December 2018. Of these, 351 cases yielded positive results for antipsychotics (24.8%) (Table II). Over these 3 years, there was a rise in the detection of AP drugs (Table II) as it was identified in the nationwide trend of the consumption of AP drugs from 2008 and 2017 (11).

Among the postmortem cases, males accounted for 60.1% ( $n = 211$ ) of the positive cases for AP (Table II). The mean age was 59.74 years old ( $SD = 16.94$ ) and was not statistically significant in both genders ( $56.63 \pm 16.63$  in males vs  $64.42 \pm 16.36$  in females,  $P > 0.05$ ), ensuring equality of variables.

Table III presents the total number of positive AP cases subdivided according to the manner of death. Suicide was the most common cause of death ( $n = 99$ , 28.2%) followed by natural death ( $n = 52$ , 14.8%), in agreement with several studies which reveal that suicide is considered to be the more prevalent cause of death among individuals suffering from psychiatric disorders (31, 32). There was only one homicide reported among the cases. In the majority of the cases, we were unable to collect the information about the type of death ( $n = 174$ , 49.6%).

The treatment of psychiatric patients often consists in the use of two or more antipsychotic agents to achieve the desired control of psychotic symptoms. The frequency of each antipsychotic detected in the blood samples is presented in Table IV. Quetiapine was the most prevalent AP ( $n = 128$ , 36.5%) followed by olanzapine ( $n = 73$ , 20.8%).

With regard to suicide, quetiapine was detected in 49 cases (49.5%) and olanzapine in 24 cases (24.2%). Both data are in concordance with AP consumption in Portugal, where quetiapine was the most consumed AP in 10-year period (2008–2017), followed by olanzapine, risperidone and haloperidol (11). Söderberg et al. present a similar study with AP in a Sweden population (12).

According to that study, quetiapine is more associated with accidental intoxication cases, while clozapine is related to suicidal cases.

During this period, there were 25 postmortem cases with AP blood concentrations above therapeutic range (33, 34). The results of antipsychotic blood concentrations, the manner of death and other relevant findings of each of the cases are given in Table V. Both typical AP (cyamemazine and levomepromazine) and atypical AP (clozapine, olanzapine and quetiapine) were present in high concentrations. The femoral blood was used in order to confirm and quantify the AP present in these postmortem cases. As already known in the literature, heart blood concentrations are significantly higher than those measured in femoral blood; for some AP, it is 3.4-fold on average (35, 36).

The mean age of these 25 postmortem cases was 51.72 years ( $SD = 10.65$ ) and 56.0% ( $n = 14$ ) of the cases were males. Only two cases had history of psychiatric that disclosed schizophrenia, two cases noted medical history of depression, two cases had information of bipolar disorder and two cases had psychiatric disorders that were unknown or unspecified. In the remaining cases, the information provided indicate intoxication, hanging or was missing.

Taking into account these 25 cases, 36% ( $n = 9$ ) of those are in agreement with the information received (psychological history or acute intoxication suspicion) and the manner of death was suicide.

Furthermore, in seven cases, there is a concomitant intake of other AP, even though they were all within therapeutic ranges. The simultaneous ingestion of drugs that induce or inhibit cytochrome P450 enzyme systems can affect normal metabolism of drugs and lead to adverse events and potential accidental overdose (8). In two cases (5 and 14), carbamazepine was identified as one of the concomitant medications and it may increase the rate at which the other drug is metabolized (8, 37). It is unlikely that the small concentration of carbamazepine (therapeutic values) would have had a significant impact on the large concentration of olanzapine and quetiapine found in these cases.

In addition, nine of the cases mentioned in Table V had quetiapine concentrations that were considered to be contributing to the cause of death. Of those, only one case had quetiapine as the only drug detected. Some studies found in the literature that evaluated the detection, quantification and analysis of this AP in postmortem blood samples reveal that this drug overdose is the potential cause of death (36–39). Recently, a systematic review on quetiapine abuse and dependence in psychiatric patients (40) indicated that psychiatrists and physicians should be aware of the addictive potential of quetiapine and the phenomenon of its misuse and abuse (41–43). In fact, in cases with information on psychiatric treatment, the phenomenon of quetiapine abuse may have been verified, and this may have been one of the causes verified in the case represented with the number 14, being a male person, 30 years old, with a history of epilepsy, depressive syndrome and drug addiction, whose toxicological results revealed a high quetiapine blood concentration, and positive results for carbamazepine, trazodone and cannabinoids, with a blood alcohol concentration of 1.28 g/L.

Olanzapine was also found in nine cases in high blood concentration and, in all of them, other drugs were presented in sufficient concentrations that might have had a synergistic effect for the cause of death. In four cases (1, 3, 4 and 6), olanzapine and other AP were detected, but only olanzapine was in toxic values. In other multidrug-related olanzapine, case 7, fluvoxamine and diazepam were found in high blood concentrations. In this suicide case, the cause of

**Table II.** Number of Positive Analysis for Drugs and for AP Between January 2016 and December 2018

| Year  | Positive cases for drugs | Positive cases for AP |               |                 |
|-------|--------------------------|-----------------------|---------------|-----------------|
|       |                          | Total, $n$ (%)        | Male, $n$ (%) | Female, $n$ (%) |
| 2016  | 509                      | 112 (20.0)            | 70 (62.5)     | 42 (37.5)       |
| 2017  | 454                      | 113 (24.9)            | 68 (60.2)     | 45 (39.8)       |
| 2018  | 450                      | 126 (28.0)            | 74 (58.7)     | 52 (41.3)       |
| Total | 1,413                    | 351 (24.8)            | 211 (60.1)    | 140 (39.9)      |

**Table III.** Manner of Death and Intoxication Information of Positive AP Cases

| Year  | Manner of death       |                        |                        |                       |                       | Positive cases for AP |
|-------|-----------------------|------------------------|------------------------|-----------------------|-----------------------|-----------------------|
|       | Suicide, <i>n</i> (%) | Accident, <i>n</i> (%) | Homicide, <i>n</i> (%) | Natural, <i>n</i> (%) | Unknown, <i>n</i> (%) |                       |
| 2016  | 34 (30.4)             | 11 (9.8)               | -                      | 16 (12.3)             | 51 (45.5)             | 112                   |
| 2017  | 31 (27.4)             | 10 (8.8)               | 1 (0.9)                | 14 (12.4)             | 57 (50.4)             | 113                   |
| 2018  | 34 (26.9)             | 4 (3.2)                | -                      | 22 (17.5)             | 66 (52.4)             | 126                   |
| Total | 99 (28.2)             | 25 (7.1)               | 1 (0.3)                | 52 (14.8)             | 174 (49.6)            | 351                   |

**Table IV.** Overview of Single Substance Findings in Positive AP Cases

| Antipsychotic   | Number of cases in which the antipsychotic was detected ( <i>n</i> = 351) <i>n</i> (%) |
|-----------------|----------------------------------------------------------------------------------------|
| Quetiapine      | 128 (36.5)                                                                             |
| Olanzapine      | 73 (20.8)                                                                              |
| Haloperidol     | 53 (15.0)                                                                              |
| Cyamemazine     | 37 (10.5)                                                                              |
| Clozapine       | 29 (8.3)                                                                               |
| Risperidone     | 23 (6.5)                                                                               |
| Levomepromazine | 18 (5.1)                                                                               |
| Chlorpromazine  | 17 (4.8)                                                                               |
| Others AP       | 46 (13.1)                                                                              |

**Table V.** Positive Findings in 25 Postmortem Cases with Blood AP Concentrations above Therapeutic Range

| Case | AP found        | Conc. <sup>a</sup> (µg/L) | Age (sex) | Information received                     | Manner of death | Other substances                                   |
|------|-----------------|---------------------------|-----------|------------------------------------------|-----------------|----------------------------------------------------|
| 1    | Olanzapine      | 1,382                     | 53 (F)    | Intoxication                             | Suicide         | Quetiapine; risperidone; BZD                       |
| 2    | Olanzapine      | 886                       | 59 (F)    | Intoxication                             | Suicide         | Paroxetine; trazodone; BZD                         |
| 3    | Olanzapine      | 950                       | 54 (M)    | Unknown                                  | Natural         | Fluvoxamine; risperidone; tramadol; trazodone; BZD |
| 4    | Olanzapine      | 563                       | 62 (M)    | Bipolar disorder                         | Natural         | Clozapine; BZD                                     |
| 5    | Olanzapine      | 816                       | 61 (F)    | Bipolar disorder                         | Suicide         | Carbamazepine; BZD                                 |
| 6    | Olanzapine      | 1,245                     | 57 (M)    | Unknown                                  | Unknown         | Cyamemazine; haloperidol                           |
| 7    | Olanzapine      | 891                       | 53 (M)    | Hanging                                  | Suicide         | Fluvoxamine; BZD                                   |
| 8    | Olanzapine      | 843                       | 62 (M)    | Hanging                                  | Suicide         | Mirtazapine; trazodone; BZD                        |
| 9    | Olanzapine      | 2,183                     | 46 (M)    | Intoxication                             | Suicide         | Fluoxetine; BZD                                    |
| 10   | Quetiapine      | 1,104                     | 46 (F)    | Unknown                                  | Unknown         | Paroxetine; trazodone; BZD                         |
| 11   | Quetiapine      | 10,384                    | 47 (F)    | Unknown                                  | Suicide         | Mirtazapine; sertraline; tramadol                  |
| 12   | Quetiapine      | 3,829                     | 52 (F)    | Intoxication                             | Suicide         | Levetiracetam; BZD                                 |
| 13   | Quetiapine      | 2,648                     | 49 (M)    | Intoxication                             | Suicide         | BZD                                                |
| 14   | Quetiapine      | 2,383                     | 30 (M)    | Manic depression Epilepsy                | Natural         | Carbamazepine; trazodone                           |
| 15   | Quetiapine      | 4,518                     | 46 (F)    | Unknown                                  | Unknown         | Fluoxetine                                         |
| 16   | Quetiapine      | 1,216                     | 75 (M)    | Intoxication Depression                  | Suicide         | BZD                                                |
| 17   | Quetiapine      | 2,266                     | 42 (M)    | Schizophrenia Manic depression           | Unknown         | -                                                  |
| 18   | Quetiapine      | 963                       | 26 (M)    | Intoxication                             | Natural         | Mirtazapine; BZD                                   |
| 19   | Clozapine       | 1,049                     | 57 (F)    | Intoxication                             | Suicide         | Olanzapine                                         |
| 20   | Clozapine       | 1,084                     | 66 (F)    | Schizophrenia Manic depression           | Unknown         | Citalopram; BZD                                    |
| 21   | Clozapine       | 1,754                     | 61 (M)    | Unknown                                  | Unknown         | Mirtazapine; tramadol; phenobarbital; primidone    |
| 22   | Cyamemazine     | 804                       | 50 (M)    | Intoxication Unspecified psych. disorder | Unknown         | Olanzapine; sertraline; BZD                        |
| 23   | Cyamemazine     | 2,615                     | 48 (M)    | Intoxication                             | Unknown         | BZD                                                |
| 24   | Cyamemazine     | 1,428                     | 49 (F)    | Intoxication                             | Suicide         | Venlafaxine                                        |
| 25   | Levomepromazine | 1,152                     | 42 (F)    | Unspecified psych. disorder              | Accident        | Fluoxetine; haloperidol; BZD                       |

<sup>a</sup>Samples with concentrations above the calibration range were diluted in blank blood before analysis.

death was hanging. Toxic levels achieved in these postmortem cases (Table V) were similar to previous papers published on olanzapine blood samples results (44, 45).

Finally, the remaining cases mentioned in Table V values of high blood concentrations similar to published papers for these drugs: clozapine (46–48), cyamemazine (49) and levomepromazine (50). Ethanol and other volatile substances were also tested, but only the case 14 was positive to ethanol.

## Conclusion

Our results reveal that antipsychotics are an increasingly prevalent class of drugs. AP must be measured not only in toxic concentrations but also in therapeutic levels in postmortem cases; therefore, it is important to come up with a sensitive method to cover the low therapeutic range in which AP are usually present.

This retrospective study has provided significant data on post-mortem blood results of AP in both therapeutic and toxic levels in order to better understand this group of drugs.

## Conflict of Interest

None.

## References

- Gardner, D.M., Baldessarini, R.J., Waraich, P. (2005) Modern antipsychotic drugs: A critical overview. *Canadian Medical Association journal*, 172, 1703–1711. [10.1503/cmaj.1041064](https://doi.org/10.1503/cmaj.1041064)
- Standaert, D.G., Sung, V.W. Pharmacology of dopaminergic neurotransmission. In: Golan, D.E., Armstrong, E.J., Armstrong, A.W. (eds) *Principles of Pharmacology. The Pathophysiologic Basis of Drug Therapy*, 4th edition, Ch 14. Wolters Kluwer: Philadelphia, 2017; pp. 206–221.
- Meyer, J.M. Pharmacotherapy of psychosis and mania. In: Hardman, B.L. (ed) *Goodman & Gilman's the Pharmacological Basis of Therapeutics*, 13th edition, Ch 14. McGraw-Hill: New York, 2018; pp. 279–302.
- Seeman, P. (2013) Schizophrenia and dopamine receptors. *European Neuropsychopharmacology*, 23, 999–1009. [10.1016/j.euroneuro.2013.06.005](https://doi.org/10.1016/j.euroneuro.2013.06.005)
- Meyer, J.M., Leckband, S.G. A history of clozapine and concepts of atypicality. In: Domino, E.F. (ed) *History of Psychopharmacology*, Vol. 2. Domemtech/NPP Books: Arlington, MA, 2013; pp. 95–106.
- Gill, S.S., Bronskill, S.E., Normand, S.L., Anderson, G.M., Sykora, K., Lam, K., et al. (2007) Antipsychotic drug use and mortality in older adults with dementia. *Annals of Internal Medicine*, 146, 775–786. [10.7326/0003-4819-146-11-200706050-00006](https://doi.org/10.7326/0003-4819-146-11-200706050-00006)
- Ray, W.A., Chung, C.P., Murray, K.T., Hall, K., Stein, C.M. (2009) Atypical antipsychotic drugs and the risk of sudden cardiac death. *The New England Journal of Medicine*, 360, 225–235. [10.1056/NEJMoa0806994](https://doi.org/10.1056/NEJMoa0806994)
- Grundmann, M., kacirowa, I., Urinowska, R. (2014) Therapeutic drug monitoring of atypical antipsychotic drugs. *Acta Pharmaceutica*, 64, 387–401. [10.2478/acph-2014-0036](https://doi.org/10.2478/acph-2014-0036)
- Burns, M.J. (2001) The pharmacology and toxicology of atypical antipsychotic agents. *Clinical Toxicology*, 39, 1–4.
- Furtado, C. (2013) Psicofármacos: Evolução do consumo em Portugal Continental (2000–2012). Gabinete de Estudos e Projectos. Infarmed, I.P., 1–21.
- Bernardo, C., Aguiar, J.P., Costa, F.A. (2019) Antipsychotic drug consumption in Portugal: A nationwide trend from 2008 to 2017. In: 11th PCNE Working Conference 2019, Egmond aan Zee, the Netherlands.
- Söderberg, C., Wernvik, E., Tillmar, A., Spigset, O., Kronstrand, R., Reis, M., et al. (2016) Antipsychotics—Postmortem fatal and non-fatal reference concentrations. *Forensic Science International*, 266, 91–101. [10.1016/j.forsciint.2016.05.002](https://doi.org/10.1016/j.forsciint.2016.05.002)
- Moretti, M., Freni, F., Valentini, B., Vignali, C., Groppi, A., Visonà, S.D., et al. (2019) Determination of antidepressants and antipsychotics in dried blood spots (DBSs) collected from post-mortem samples and evaluation of the stability over a three-month period. *Molecules*, 24, 1–24. [10.3390/molecules24203636](https://doi.org/10.3390/molecules24203636)
- Saar, E., Gerostamoulos, D., Drummer, O.H., Beyer, J. (2010) Identification and quantification of 30 antipsychotics in blood using LC-MS/MS. *Journal of Mass Spectrometry*, 45, 915–925. [10.1002/jms.1783](https://doi.org/10.1002/jms.1783)
- Kratzch, C., Peters, F.T., Kraemer, T., Weber, A.A., Maurer, H.H. (2003) Screening, library-assisted identification and validated quantification of fifteen neuroleptics and three of their metabolites in plasma by liquid chromatography/mass spectrometry with atmospheric pressure chemical ionization. *Journal of Mass Spectrometry*, 38, 283–295. [10.1002/jms.440](https://doi.org/10.1002/jms.440)
- Roman, M., Kronstrand, R., Lindsted, D., Josefsson, M. (2008) Quantification of seven low-dosage antipsychotic drugs in human post-mortem blood using LC-MS/MS. *Journal of Analytical Toxicology*, 32, 147–155. [10.1093/jat/32.2.147](https://doi.org/10.1093/jat/32.2.147)
- Miroshnichenko, I.I., Baymeeva, N.V. (2018) Simultaneous determination of antipsychotic drugs and their active metabolites by LC-MS-MS and its application to therapeutic drug monitoring. *Journal of Chromatographic Science*, 56, 510–517. [10.1093/chromsci/bmy024](https://doi.org/10.1093/chromsci/bmy024)
- Fisher, D.S., Partridge, S.J., Handley, S.A., Couchman, L., Morgan, P.E., Flanagan, R.J. (2013) LC-MS/MS of some atypical antipsychotics in human plasma, serum, oral fluid and haemolysed whole blood. *Forensic Science International*, 229, 145–150. [10.1016/j.forsciint.2013.02.010](https://doi.org/10.1016/j.forsciint.2013.02.010)
- Sampedro, M.C., Unceta, N., Gómez-Caballero, A., Callado, L.F., Morentin, B., Goicolea, M.A., et al. (2012) Screening and quantification of antipsychotic drugs in human brain tissue by liquid chromatography-tandem mass spectrometry: Application to post-mortem diagnostic of forensic interest. *Forensic Science International*, 219, 172–178. [10.1016/j.forsciint.2012.01.002](https://doi.org/10.1016/j.forsciint.2012.01.002)
- Saar, E., Beyer, J., Gerostamoulos, D., Drummer, O.H. (2012) The analysis of antipsychotics drugs in human matrices using LC-MS/(MS). *Drug Testing and Analysis*, 4, 376–394. [10.1002/dta.1337](https://doi.org/10.1002/dta.1337)
- Zhang, G., Terry, A.V., Jr, Bartlett, M.G. (2008) Bioanalytical methods for the determination of antipsychotics drugs. *Biomedical Chromatography*, 22, 671–687. [10.1002/bmc.997](https://doi.org/10.1002/bmc.997)
- Baymeeva, N.V., Miroshnichenko, I.I. (2016) Structure of chemical compounds, methods of analysis and process control. *Pharmaceutical Chemistry Journal*, 50, 50–56.
- Queiroz, M.E.C., Pinto, M.L., Cruz, J.C., Ushirohira, J.M., Dias, I.C.S., Hallak, J.E.C. (2019) Schizophrenia: Recent advances in LC-MS/MS methods to determine antipsychotic drugs in biological samples: A review. *Bioanalysis*, 10.4155/bio-2018-0155.
- Peters, F.T., Maurer, H.H. (2002) Bioanalytical method validation and its implications for forensic and clinical toxicology - A review. *Accreditation and Quality Assurance*, 7, 441–449. [10.1007/s00769-002-0516-5](https://doi.org/10.1007/s00769-002-0516-5)
- Peters, F.T., Drummer, O.H., Musshoff, F. (2007) Validation of new methods. *Forensic Science International*, 165, 216–224. [10.1016/j.forsciint.2006.05.021](https://doi.org/10.1016/j.forsciint.2006.05.021)
- SWGTOX – Scientific Working Group for Forensic Toxicology. Standard Practices for Method Validation in Forensic Toxicology SWGTOX Doc 003. Online website <http://www.swgtox.org/documents/Validation3.pdf>
- WADA – World Anti-Doping Agency. International Standard for Laboratories. Identification criteria for qualitative assays TD2010IDCR. Online website <http://www.wada-ama.org/en/Anti-Doping-Community/Anti-Doping-Laboratories/Technical-Documents/>
- Saar, E., Gerostamoulos, D., Drummer, O.H., Beyer, J. (2011) Assessment of the stability of 30 antipsychotic drugs in stored blood specimens. *Forensic Science International*, 215, pp. 152–158. [10.1016/j.forsciint.2011.02.022](https://doi.org/10.1016/j.forsciint.2011.02.022)

29. Lakso, H.A. (2001) Instability of olanzapine in calf serum. *Therapeutic Drug Monitoring*, **23**, pp. 454–455. [10.1097/00007691-200108000-00023](https://doi.org/10.1097/00007691-200108000-00023)
30. Chin, C., Zhang, Z.P., Kames, H.T. (2004) A study of matrix effects on an LC/MS/MS assay for olanzapine and desmethyl olanzapine. *Journal of Pharmaceutical and Biomedical Analysis*, **35**, 1149–1167. [10.1016/j.jpba.2004.01.005](https://doi.org/10.1016/j.jpba.2004.01.005)
31. Chesney, E., Goodwin, G.M., Fazel, S. (2014) Risks of all-cause and suicide mortality in mental disorders: A meta-review. *World Psychiatry*, **13**, 153–160. [10.1002/wps.20128](https://doi.org/10.1002/wps.20128)
32. Brådvik, L. (2018) Suicide risk and mental disorders. *International Journal of Environmental Research and Public Health*, **15**, 2028. [10.1002/wps.20128](https://doi.org/10.1002/wps.20128)
33. The International Association of Forensic Toxicologists. Reference blood level list of therapeutic and toxic substances, 2004.
34. Schulz, M., Iweresen-Bergmann, S., Andresen, H., Schmoltdt, A. (2012) Therapeutic and toxic blood concentrations of nearly 1000 drugs and other xenobiotics. *Critical Care*, **16**, R136. [10.1186/cc11441](https://doi.org/10.1186/cc11441)
35. Rodda, K.E., Drummer, O.H. (2006) The redistribution of selected psychiatric drugs in post-mortem cases. *Forensic Science International*, **164**, 235–239. [10.1016/j.forsciint.2006.02.013](https://doi.org/10.1016/j.forsciint.2006.02.013)
36. Parker, D.R., McIntyre, I.M. (2005) Cases studies of postmortem quetiapine: Therapeutic or toxic concentrations? *Journal of Analytical Toxicology*, **29**, 407–412. [10.1093/jat/29.5.407](https://doi.org/10.1093/jat/29.5.407)
37. Langman, L.J., Kaliciak, H.A., Carlyle, S. (2004) Fatal overdoses associated with quetiapine. *Journal of Analytical Toxicology*, **28**, 520–525. [10.1093/jat/28.6.520](https://doi.org/10.1093/jat/28.6.520)
38. Anderson, D.T., Fritz, K.L. (2000) Quetiapine (Seroquel®) concentrations in seven postmortem cases. *Journal of Analytical Toxicology*, **24**, 300–304. [10.1093/jat/24.4.300](https://doi.org/10.1093/jat/24.4.300)
39. Mainland, M., Wagner, M.A., Gork, S.B., Wong, S.H. (2001) Quetiapine-related fatalities. *Journal of Analytical Toxicology*, **25**, 381–382.
40. Vento, A.E., et al. (2020) Quetiapine abuse fourteen years later: Where are we now? A systematic review. *Substance Use & Misuse*, **55**, 304–313. [10.1080/10826084.2019.1668013](https://doi.org/10.1080/10826084.2019.1668013)
41. Kim, S., Lee, G., Kim, E., Jung, H., Chang, J. (2017) Quetiapine misuse and abuse: Is it an atypical paradigm of drug seeking behavior? *Journal of Research in Pharmacy Practice*, **6**, 12–15. [10.4103/2279-042X.200987](https://doi.org/10.4103/2279-042X.200987)
42. Cubala, W.J., Springer, J. (2014) Quetiapine abuse and dependence in psychiatric patients: A systematic review of 25 case reports in the literature. *Journal of Substance Use*, **19**, 388–393. [10.3109/14659891.2013.810309](https://doi.org/10.3109/14659891.2013.810309)
43. Sansone, R.A., Sansone, L.A. (2010) Is Seroquel developing an illicit reputation for misuse/abuse?. *Psychiatry (Edgmont)*, **7**, 13–16.
44. Chue, P., Singer, P. (2003) A review of olanzapine-associated toxicity and fatality in overdose. *Journal of Psychiatry and Neuroscience*, **28**, 253–261.
45. Vance, C., McIntyre, I.M. (2009) Postmortem tissue concentrations of olanzapine. *Journal of Analytical Toxicology*, **33**, 15–26. [10.1093/jat/33.1.15](https://doi.org/10.1093/jat/33.1.15)
46. Singer, P.P., Jones, G.R. (1995) A death involving an overdose of clozapine. *Canadian Society of Forensic Science Journal*, **28**, 127–130. [10.1080/00085030.1995.10757476](https://doi.org/10.1080/00085030.1995.10757476)
47. Worm, K., Kringdholm, B., Steentoft, A. (1993) Clozapine cases with fatal, toxic or therapeutic concentrations. *International Journal of Legal Medicine*, **106**, 115–118. [10.1007/BF01225229](https://doi.org/10.1007/BF01225229)
48. Stark, A., Scott, J. (2012) A review of the use of clozapine levels to guide treatment and determine cause of death. *Australian and New Zealand Journal of Psychiatry*, **46**, 816–825. [10.1177/0004867412438871](https://doi.org/10.1177/0004867412438871)
49. Alunni-Perret, V., Ohayon, P., Duval, H.P., Quatrehomme, G. (2003) Acute fatal poisoning with cyamemazine. *Forensic Science International*, **137**, 13–15. [10.1016/S0379-0738\(03\)00260-3](https://doi.org/10.1016/S0379-0738(03)00260-3)
50. Klys, M., Bujak-Gizycka, B., Klementowicz, W., Kunz, J. (2003) Case study: Distribution and redistribution of levomepromazine and its metabolites in a fatal poisoning. *Canadian Society of Forensic Science Journal*, **30**, 77–88. [10.1080/00085030.2003.10757555](https://doi.org/10.1080/00085030.2003.10757555)
